# Supplementary material for: Trends in Incidence and Outcomes of Hospitalizations for Urinary Tract Infection among Older People in Spain (2001–2018)
Source: MDPI journal article supplement (doi:10.3390/jcm10112332), 2021-05-26
Supplement: s1 [file s1]

Table S1. ICD 9 and ICD 10 diagnosis codes for Urinary Tract Infection according to the Agency for Healthcare Research and Quality

| Diagnosis                                                            | ICD 9 codes    | ICD 10 codes |
|----------------------------------------------------------------------|----------------|--------------|
| Acute pyelonephritis                                                 | 590.10, 590.11 | N10          |
| Urethritis cystica                                                   | 590.3          | N28.86       |
| Tubulo-Interstitial nephritis, not specified as acute or chronic     | 590.80         | N12          |
| Acute cystitis without hematuria                                     | 595.0          | N30.00       |
| Renal and perinephric abscess                                        | 590.2          | N15.1        |
| Acute cystitis with hematuria                                        | 595.0          | N30.01       |
| Renal tubulo-interstitial disease, unspecified                       | 590.9          | N15.9        |
| Cystitis, unspecified without hematuria                              | 595.9          | N30.90       |
| Renal tubulo-interstitial disorders in diseases classified elsewhere | 590.81         | N16          |
| Cystitis, unspecified with hematuria                                 | 595.9          | N30.91       |
| Pyelitis cystica                                                     | 590.3          | N28.84       |
| Urinary tract infection, site not specified                          | 599.0          | N39.0        |
| Pyeloureteritis cystica                                              | 590.3          | N2885        |

**Table S2.** ICD 9 and ICD 10 codes used to identify pathogen isolations and conditions included in this investigation.

| DIAGNOSIS/PROCEDURES                                                        | ICD 9 CM                                                                                                                                         | ICD 10 CM                                                                                                                                                                                             |
|-----------------------------------------------------------------------------|--------------------------------------------------------------------------------------------------------------------------------------------------|-------------------------------------------------------------------------------------------------------------------------------------------------------------------------------------------------------|
| Escherichia coli                                                            | 041.4; 041.41; 041.42;<br>041.43; 041.49;<br>038.42                                                                                              | B96.21; B96.22;<br>B96.23; B96.20<br>B96.29; A41.51                                                                                                                                                   |
| Pseudomonas (aeruginosa) (mallei)<br>(pseudomallei)                         | 041.7; 038.43                                                                                                                                    | B96.5; A41.52                                                                                                                                                                                         |
| Klebsiella pneumoniae                                                       | 041.3                                                                                                                                            | B96.1                                                                                                                                                                                                 |
| Enterococcus                                                                | 041.04                                                                                                                                           | B95.2; A40.2; A41.81                                                                                                                                                                                  |
| Proteus (mirabilis) (morganii)                                              | 041.6                                                                                                                                            | B96.4                                                                                                                                                                                                 |
| Staphylococcus aureus. (methicillin<br>susceptible) (methicillin resistant) | 041.1; 041.10; 041.11;<br>041.12; 041.19; 038.1;<br>038.10; 038.11;<br>038.12; 038.19                                                            | B95.6; B95.61;<br>B95.62; B95.7; B95.8;<br>A41.0; A41.1; A41.2<br>A41.01; A41.02                                                                                                                      |
| Bacteriemia                                                                 | 790.7                                                                                                                                            | R78.81                                                                                                                                                                                                |
| Sepsis                                                                      | 038.0; 038.1; 038.10;<br>038.11; 038.12;<br>038.19; 038.2; 038.3;<br>038.4; 038.40; 38.41;<br>038.42; 038.43;<br>038.44; 038.49; 038.8;<br>038.9 | A40.0; A40.1; A40.1;<br>A40.3; A40.8; A40.9;<br>A41; A41.0; A41.01;<br>A41.02; 41.1;41.2;<br>A41.3; A41.4; A41.5;<br>A41.50; A41.51;<br>A41.52; A41.53;<br>A41.59; A41.8;<br>A41.81; A41.89;<br>A41.9 |
| Urinary catheter                                                            | 57.94; 57.95                                                                                                                                     | 0T9B70Z; 0T9B80Z;<br>0T2BX0Z                                                                                                                                                                          |
| Urinary incontinence                                                        | 788.3x, 788.91                                                                                                                                   | R32, N39.3,<br>N39.4XX, R39.81                                                                                                                                                                        |
